# Supplementary material
Source: PubMed Central journal article supplement (PMC3128775)
Supplement: Supp_Table.pdf [file Supp_Table.pdf]

SUPPLEMENTAL TABLE S1. LIST OF ANTIBODIES USED FOR WESTERN BLOT VERIFICATION

| <i>Antibody</i> | <i>Company</i>     | <i>Catalog No.</i> |
|-----------------|--------------------|--------------------|
| S100A4          | Abcam              | Ab41532            |
| BMP2            | Abcam              | Ab14933            |
| ANKH            | Abcam              | Ab54530            |
| GAPDH           | Abcam              | Ab8245             |
| H3K4me3         | Abcam              | Ab1012             |
| H3K9me3         | Abcam              | Ab8898             |
| H4              | Abcam              | Ab10158            |
| Periostin       | Abcam              | Ab14041            |
| IL6             | Abcam              | Ab6672             |
| SFRP1           | Abcam              | Ab4193             |
| PTGDS           | Abcam              | Ab89709            |
| Asporin         | Abcam              | Ab31303            |
| MGP             | Abcam              | Ab70193            |
| IBSP            | Abcam              | Ab78278            |
| IGFBP5          | Abcam              | Ab4255             |
| THBS2           | Abcam              | Ab89805            |
| GDNF            | Abcam              | Ab18956            |
| JAG1            | Abcam              | Ab7771             |
| DKK1            | Abcam              | Ab88334            |
| Keratin 18      | Abcam              | Ab668              |
| Nestin          | Abcam              | Ab22035            |
| SLUG            | Abcam              | Ab27568            |
| Osteocalcin     | Abbiotech          | #250483            |
| PITX2           | Santa Cruz Biotech | Sc-33147           |
| Netrin 4        | Santa Cruz Biotech | Sc-67000           |

Abbreviations: DKK, Dickkopf1; IL, interleukin; GDNF, glial cell line-derived neurotrophic factor; JAG1, Jagged 1; PITX2, paired-like homeodomain transcription factor; PTGDS, prostaglandin-H2 D-isomerase; SFRP1, secreted frizzled-related protein 1; THBS2, thrombospondin 2; BMP2, bone morphogenetic protein 2; IBSP, integrin-binding sialoprotein; SLUG, snail homolog 2 (SNAI2).
